# Supplementary material for: Integrated Analysis of Metabolomics and Lipidomics in Plasma of T2DM Patients with Diabetic Retinopathy
Source: MDPI journal article supplement (doi:10.3390/pharmaceutics14122751), 2022-12-08

|      |                                                                                                                                                                |
|------|----------------------------------------------------------------------------------------------------------------------------------------------------------------|
| Sex  |                                                                                                                                                                |
| ***  | 3322neg_PC(36:6)+HCOO                                                                                                                                          |
| *    | Citrate                                                                                                                                                        |
| *    | Arg–Arg–Arg                                                                                                                                                    |
| *    | Asiatic acid                                                                                                                                                   |
| *    | Dihydroxyacetone                                                                                                                                               |
| *    | Pi 38:4                                                                                                                                                        |
| *    | 1–hexadecanoyl–2–octadecadienoyl–sn–glycero–3–phosphocholine                                                                                                   |
| *    | Alisol b acetate                                                                                                                                               |
| *    | 9–deoxy–9–methylene–16,16–dimethylprostaglandin e2                                                                                                             |
| n.s. | 1–hexadecanoyl–2–sn–glycero–3–phosphate                                                                                                                        |
| n.s. | Isopropyl dodecylfluorophosphonate                                                                                                                             |
| n.s. | Pi 36:2                                                                                                                                                        |
| n.s. | 1988pos_ChE(18:2)+NH4                                                                                                                                          |
| n.s. | Oxandrolone                                                                                                                                                    |
| n.s. | Echinocystic acid                                                                                                                                              |
| n.s. | Nocardamine                                                                                                                                                    |
| n.s. | Pachymic acid                                                                                                                                                  |
| n.s. | alpha–D–Glucose 1–phosphate                                                                                                                                    |
| n.s. | Nonapropylene glycol                                                                                                                                           |
| n.s. | 1–hydroxy vitamin d2                                                                                                                                           |
| n.s. | 17,20–dimethylprostaglandin f1.alpha.                                                                                                                          |
| n.s. | Linoelaidic acid                                                                                                                                               |
| n.s. | 10180pos_PI(38:4)+H                                                                                                                                            |
| n.s. | Dereplicator identification – rhapsamine                                                                                                                       |
| n.s. | 7.alpha.,27–dihydroxycholesterol                                                                                                                               |
| n.s. | 1–oleoyl–sn–glycero–3–phosphoethanolamine                                                                                                                      |
| n.s. | 3–dehydroepiandrosterone sulfate                                                                                                                               |
| n.s. | 1559neg_Hex2Cer(d42:2)+HCOO                                                                                                                                    |
| n.s. | Echimidine                                                                                                                                                     |
| n.s. | 435neg_Cer(d42:1)+HCOO                                                                                                                                         |
| n.s. | Diethyl sebacate                                                                                                                                               |
| n.s. | Linolenic acid                                                                                                                                                 |
| n.s. | 2867pos_DG(36:3e)+Na                                                                                                                                           |
| n.s. | 3267neg_PC(36:4)+HCOO                                                                                                                                          |
| n.s. | Oseltamivir                                                                                                                                                    |
| n.s. | Vecuronium                                                                                                                                                     |
| n.s. | Sclareolide                                                                                                                                                    |
| n.s. | 7–alpha–hydroxy cholesterol                                                                                                                                    |
| n.s. | Dehydrotrametenolic acid                                                                                                                                       |
| n.s. | 1–octadecanoyl–sn–glycero–3–phospho–(1'-myo–inositol)                                                                                                          |
| n.s. | all cis–(6,9,12)–Linolenic acid                                                                                                                                |
| n.s. | Eicosapentaenoic Acid ethyl ester                                                                                                                              |
| n.s. | Palmitoylserotonin                                                                                                                                             |
| n.s. | DL–4–hydroxy–3–methoxymandelic acid                                                                                                                            |
| n.s. | 11912pos_SPH(d21:2)+H                                                                                                                                          |
| n.s. | .beta.–amyrin acetate                                                                                                                                          |
| n.s. | Atorvastatin                                                                                                                                                   |
| n.s. | (2e,6e,12e)–18–(2,6–dioxopiperidin–4–yl)–9,11–dihydroxy–8–methoxy–10,12,14–trimethyl–15–oxooctadeca–2,6,12–trienoic acid                                       |
| n.s. | N–Acetyl–D–Glucosamine 6–Phosphate                                                                                                                             |
| n.s. | Flufenacet ethanesulfonic acid                                                                                                                                 |
| n.s. | 1–palmitoyl–2–hydroxy–sn–glycero–3–phosphoethanolamine                                                                                                         |
| n.s. | 350neg_Cer(d40:2)+HCOO                                                                                                                                         |
| n.s. | Oligomycin a                                                                                                                                                   |
| n.s. | 9,12–octadecadiynoic acid                                                                                                                                      |
| n.s. | 3–methylbenzyl alcohol                                                                                                                                         |
| n.s. | Dibutyl phthalate                                                                                                                                              |
| n.s. | (2.beta.,3.alpha.,5.alpha.,16.beta.,17.beta.)–2,16–di–(1–piperidiny)androstane–3,17–diol 3–acetate                                                             |
| n.s. | 1–(9z,12z–octadecadienoyl)–2–hydroxy–sn–glycero–3–phosphoethanolamine                                                                                          |
| n.s. | 870pos_Cer(m35:0)+H–H2O                                                                                                                                        |
| n.s. | 1,2–dipalmitoleoyl–sn–glycero–3–phosphocholine                                                                                                                 |
| n.s. | 2–ethyl–2–p–tolylmalonamide                                                                                                                                    |
| n.s. | 19190pos_WE(36:2)+H                                                                                                                                            |
| n.s. | Taurine                                                                                                                                                        |
| n.s. | 11449pos_SM(d44:5)+H                                                                                                                                           |
| n.s. | Octadecanoic acid                                                                                                                                              |
| n.s. | 2101pos_DG(19:3e)+NH4                                                                                                                                          |
| n.s. | 3441neg_PC(38:2e)+HCOO                                                                                                                                         |
| n.s. | 3836pos_LPC(18:0e)+H                                                                                                                                           |
| n.s. | Prostaglandin f2.beta.                                                                                                                                         |
| n.s. | 1–palmitoyl–2–linoleoyl–rac–glycerol                                                                                                                           |
| n.s. | 6–[(3e,6e)–2,5–dihydroxy–4,6–dimethyl–7–(1,2,4–trimethyl–3,6–dioxabicyclo[3.1.0]hexan–4–yl)hepta–3,6–dien–2–yl]–4–methoxy–3,5–dimethylpyran–2–one              |
| n.s. | Prostaglandin f2.alpha.                                                                                                                                        |
| n.s. | 1–(1',3'–benzodioxol–5'–yl)–2–butanamine                                                                                                                       |
| n.s. | His–Trp                                                                                                                                                        |
| n.s. | 9120pos_PE(34:2)+H                                                                                                                                             |
| n.s. | Hyperoside                                                                                                                                                     |
| n.s. | Pro–Glu                                                                                                                                                        |
| n.s. | 4–hydroxyphenethyl alcohol                                                                                                                                     |
| n.s. | 4478neg_PE(36:5e)–H                                                                                                                                            |
| n.s. | Scopolin                                                                                                                                                       |
| n.s. | Ergothioneine                                                                                                                                                  |
| n.s. | 6'–sialyllactose                                                                                                                                               |
| n.s. | 4686neg_PE(38:8e)–H                                                                                                                                            |
| n.s. | Nonapropylene glycol monobutyl ether                                                                                                                           |
| n.s. | 867pos_Cer(m35:0)+H–H2O                                                                                                                                        |
| n.s. | Sucrose                                                                                                                                                        |
| n.s. | L–homoarginine                                                                                                                                                 |
| n.s. | Glutamic acid                                                                                                                                                  |
| n.s. | 1654neg_LPC(16:0)+HCOO                                                                                                                                         |
| n.s. | L–Valine                                                                                                                                                       |
| n.s. | Psoralidin                                                                                                                                                     |
| n.s. | 4270neg_PE(34:2)–H                                                                                                                                             |
| n.s. | 10385pos_SM(d34:1)+H                                                                                                                                           |
| n.s. | Beta–octylglucoside                                                                                                                                            |
| n.s. | Amylcinnamic aldehyde                                                                                                                                          |
| n.s. | L–Asparagine                                                                                                                                                   |
| n.s. | Myo–inositol                                                                                                                                                   |
| n.s. | Pseudouridine                                                                                                                                                  |
| n.s. | 2–(2,6–dihydroxy–4–methoxycarbonylbenzoyl)–3–hydroxybenzoic acid                                                                                               |
| n.s. | Trimethylamine n–oxide                                                                                                                                         |
| n.s. | Glutamine                                                                                                                                                      |
| n.s. | Glycochenodeoxycholate                                                                                                                                         |
| n.s. | Phenylacetyl–l–glutamine                                                                                                                                       |
| n.s. | Proline                                                                                                                                                        |
| n.s. | 19216pos_WE(38:2)+H                                                                                                                                            |
| n.s. | Dihydro–4,4–dimethyl–2,3–furandione                                                                                                                            |
| n.s. | Glycodeoxycholic acid                                                                                                                                          |
| n.s. | DL–threonine                                                                                                                                                   |
| n.s. | 3366neg_PC(37:4)+HCOO                                                                                                                                          |
| n.s. | Diethyl 2,4–dimethylpyrrole–3,5–dicarboxylate                                                                                                                  |
| n.s. | Piperine                                                                                                                                                       |
| n.s. | N–benzylideneaniline n–oxide                                                                                                                                   |
| n.s. | 9751pos_PE(40:5e)+H                                                                                                                                            |
| n.s. | 1h–indole–5–sulfonamide, n–(3–chlorophenyl)–3–[[3,5–dimethyl–4–[(4–methyl–1–piperazinyl)carbonyl]–1h–pyrrol–2–yl]methylene]–2,3–dihydro–n–methyl–2–oxo–, (3z)– |
| *    | 1–(4–piperidiny)l–1,3–dihydro–2h–indol–2–one                                                                                                                   |
| *    | 3–methylglutarylcarnitine                                                                                                                                      |
| *    | Malonyl–l–carnitine                                                                                                                                            |
| **   | Anserine                                                                                                                                                       |
| **   | 12459pos_TG(37:7e)+Na                                                                                                                                          |
| **   | 1–Methylhistidine                                                                                                                                              |
| **   | Val–Pro                                                                                                                                                        |

n.s. p>0.05

\* p<0.05 and >=0.01

\*\* p<0.01 and >=0.001

\*\*\* p<0.001

Relative Coefficient

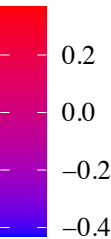

Supplement: s1 [file s1]
