# Supplementary figures and images for: Integrated Analysis of Metabolomics and Lipidomics in Plasma of T2DM Patients with Diabetic Retinopathy
Source: MDPI journal article supplement (doi:10.3390/pharmaceutics14122751), 2022-12-08

**PDR vs Control**

**NPDR vs Control**

**PDR vs NPDR**

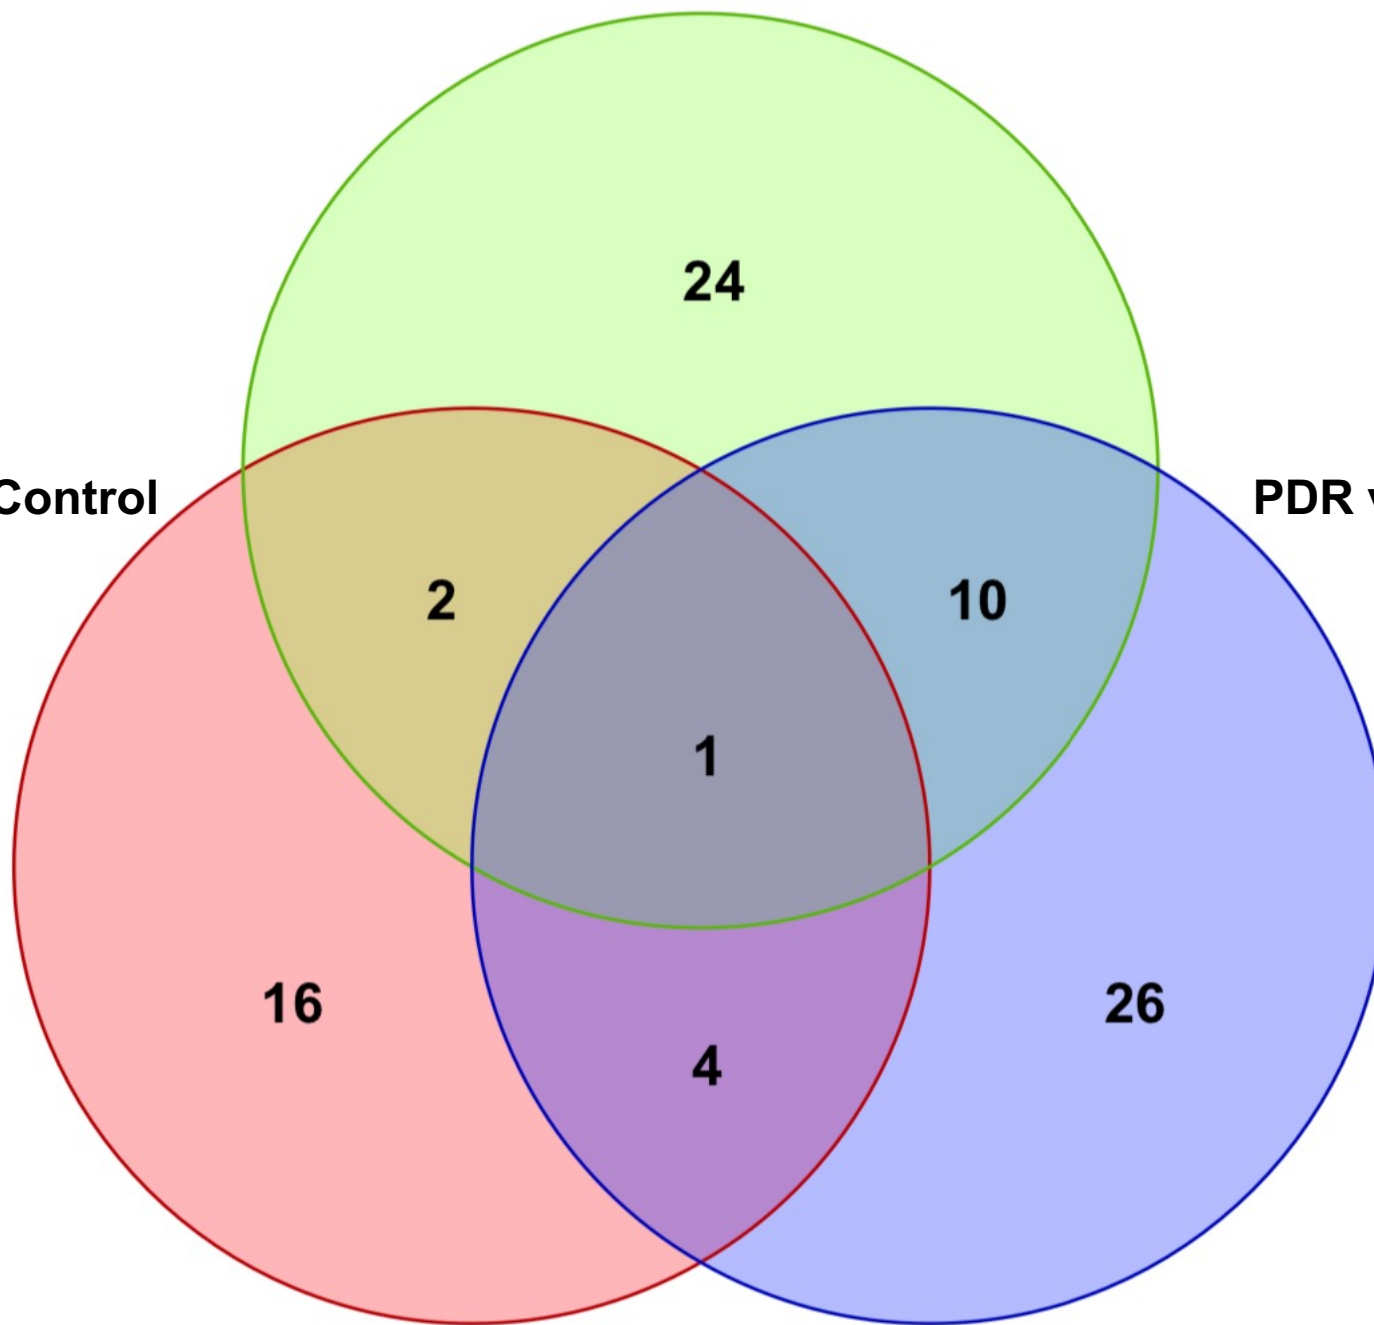

Supplement: s1 [file s1]

**A**

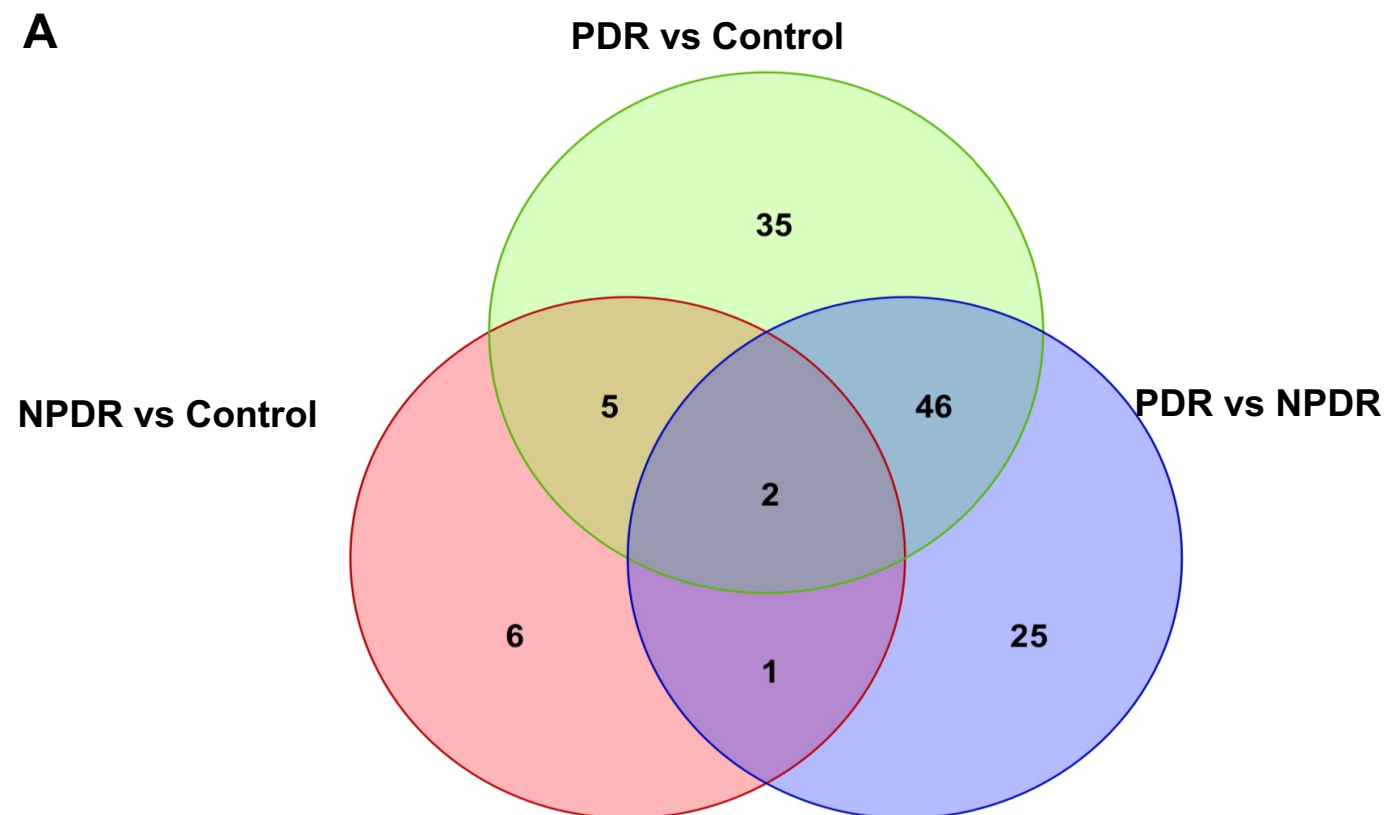

**B**

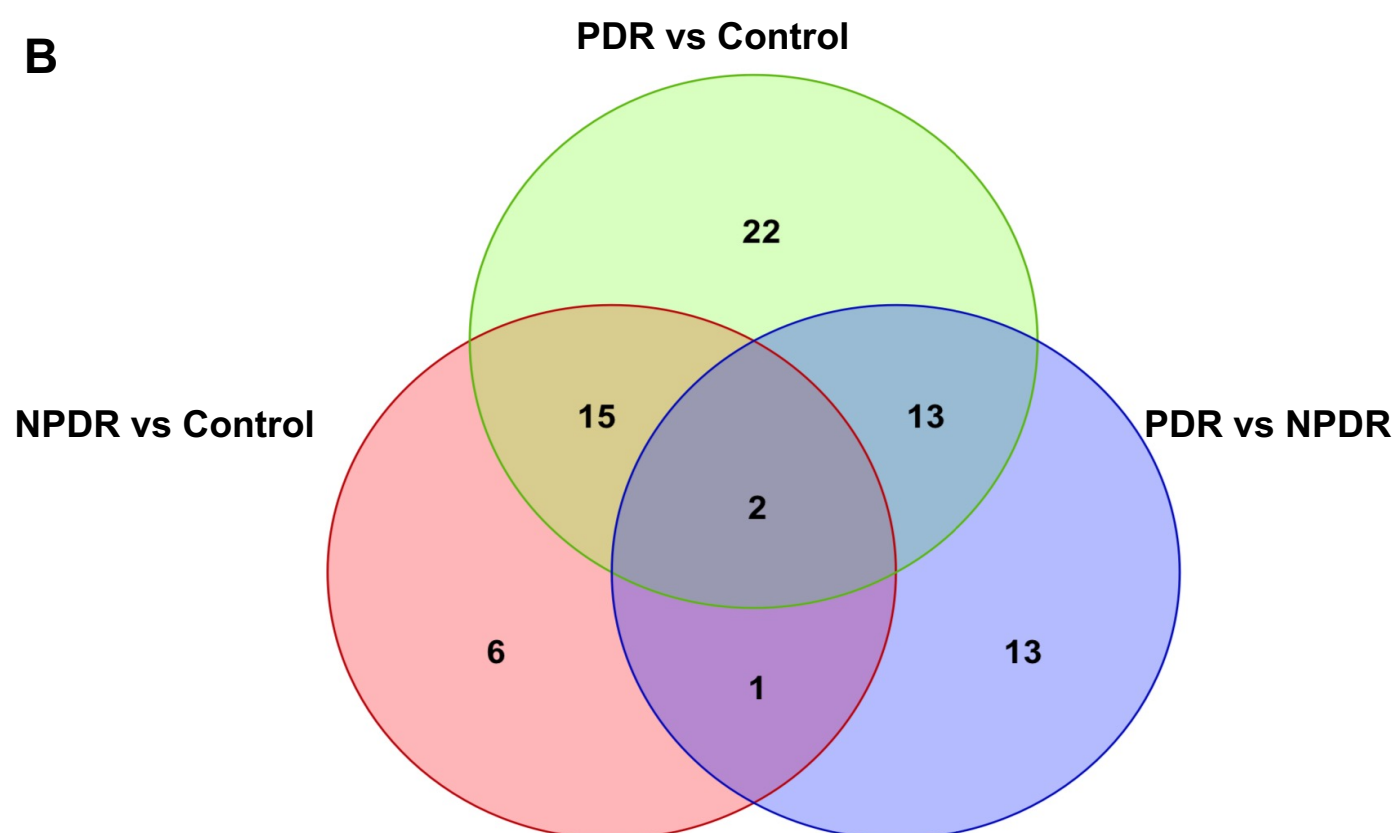

Supplement: s1 [file s1]

**A**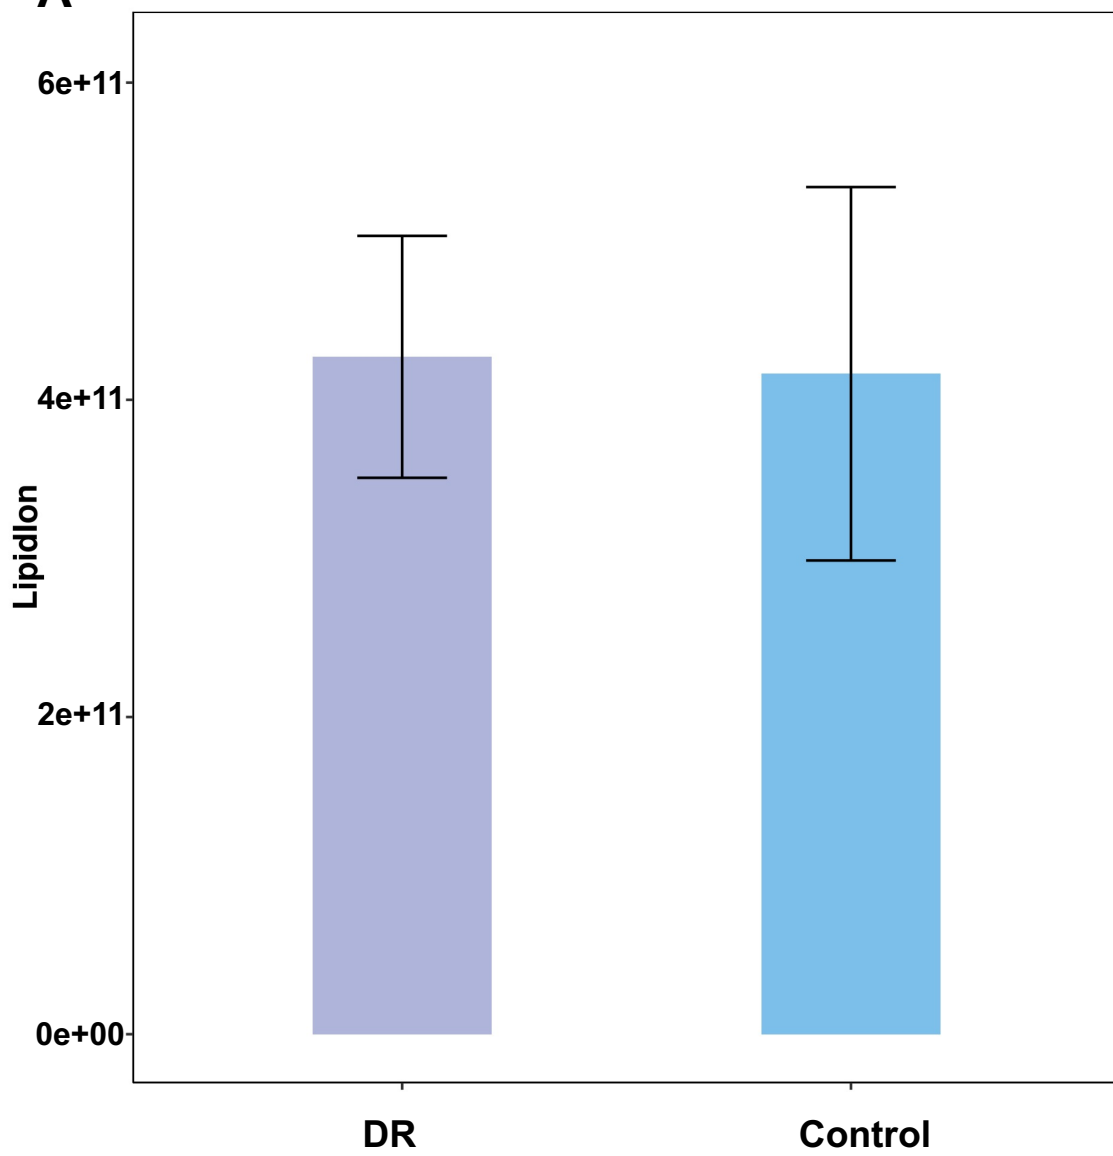**B**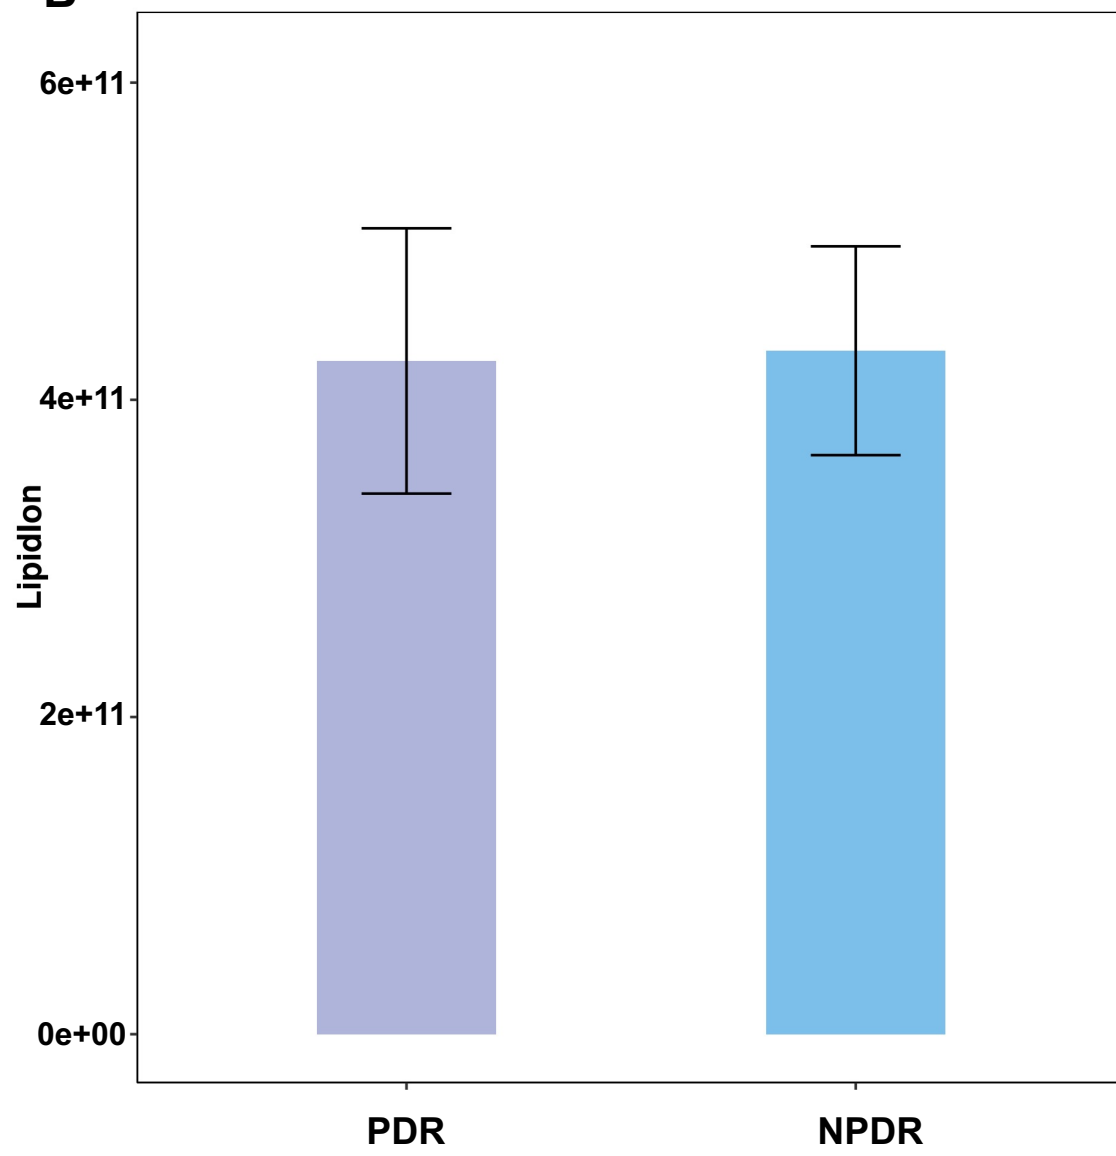

Supplement: s1 [file s1]
